# Supplementary material for: Population Pharmacokinetic Modeling of Zaltoprofen in Healthy Adults: Exploring the Dosage Regimen
Source: Pharmaceuticals (Basel). 2023 Jan 22;16(2):161. doi: 10.3390/ph16020161 (PMC9962663; doi:10.3390/ph16020161)
Supplement: Supplementary file 1 [file pharmaceuticals-16-00161-s001.zip › pharmaceuticals-2136670-supplementary.pdf]

# **Population pharmacokinetic modeling of zaltoprofen in healthy adults: Exploring the dosage regimen**

## **Supplementary Materials**

Ji-Hun Jang<sup>1,†</sup>, Seung-Hyun Jeong<sup>2,†</sup>, and Yong-Bok Lee<sup>1,\*</sup>

<sup>1</sup> College of Pharmacy, Chonnam National University, 77 Yongbong-ro, Buk-gu, Gwangju, 61186, Republic of Korea

<sup>2</sup> College of Pharmacy, Sunchon National University, 255 Jungang-ro, Suncheon-si, Jeollanam-do, 57922, Republic of Korea

<sup>†</sup> These authors (Seung-Hyun Jeong & Ji-Hun Jang) contributed equally as first-authors to this manuscript.

\*Corresponding author:

Yong Bok Lee

College of Pharmacy, Chonnam National University, 77 Yongbong-ro, Buk-gu, Gwangju, 61186, Republic of Korea

Tel.: +82-62-530-2931; Fax: +82-62-530-0106

E-mail: leeyb@chonnam.ac.kr

## Supplementary Materials

### 1. Determination of clinical biochemistry parameters

Blank serum samples obtained immediately before oral zaltoprofen administration (0 h) were used to analyze the clinical biochemical parameters, including total proteins, albumin, alkaline phosphatase (ALP), aspartate transaminase (AST), alanine transaminase (ALT), total bilirubin, blood urea nitrogen, creatinine, creatinine clearance (CrCL), and glomerular filtration rate (GFR). Determination of clinical biochemical parameter values was performed by serological analysis through a dry automated analyzer. The analytical instrument used was a microslides VITROS (Ortho Clinical Diagnostics, NJ, USA) operated by reflectance spectrophotometry. CrCL was calculated based on the Cockcroft-Gault equation:  $[(140 - \text{age}) \times \text{body weight (kg)}] / [\text{serum creatinine (mg/dL)} \times 72]$ . GFR was calculated using the Modification-of-Diet-in-Renal-Disease formula:  $186.3 \times [\text{serum creatinine (mg/dL)}]^{-1.154} \times \text{age (year)}^{-0.203}$ . Body mass index (BMI) and body surface area (BSA) were calculated based on the individuals' weight and height information. BMI was calculated based on the Kaup index:  $[\text{body weight (kg)} / \text{height}^2 \text{ (m}^2\text{)}]$ . BSA was calculated based on the Mosteller formula:  $\sqrt{(\text{height (cm)} \times \text{weight (kg)}) / 3600}$ .

### 2. Determination of *CYP2C9\*1* and *\*3* alleles

Only the alleles of *\*1* and *\*3* were confirmed after analyzing the *CYP2C9* genotypes. The genotypes of each individual at the *CYP2C9\*3* allele were determined using polymerase chain reaction-restriction fragment length polymorphism (PCR-RFLP) to amplify the portions of exon 7 containing A1075→C SNP as previously described, with minor modifications. For the *CYP2C9\*3* allele genotype, PCR was carried out in a 20 µL reaction mixture containing PCR PreMix, 200–300 ng of genomic DNA, and 10 pmol of each primer. The sequences of the forward and reverse primers were 5'-TGCACGAGGTCCAGAGGTAC-3' and 5'-ACAAACTTACCTTGGAATGAGA-3' for the *CYP2C9\*3* genotype.

PCR was conducted by an initial denaturation at 94 °C for five min followed by 30 cycles, each consisting of denaturation at 94 °C for one min, annealing at 55 °C for one min, and

extension at 72 °C for one min. The final extension was performed at 72 °C for 10 min. The amplified 105-bp fragment consisted of 10 bp of intron and 95 bp of exon 7. PCR products were electrophoresed on 2% agarose gel and visualized by ultraviolet transillumination after staining with ethidium bromide. Aliquots of each PCR product were digested with restriction enzyme *KpnI* for CYP2C9\*3 at 37 °C for 1.5 h. The digested fragments were separated by electrophoresis using a 2.5% agarose gel and visualized under ultraviolet light after staining the gel with ethidium bromide. A cross-platform confirmation procedure was carried out through direct sequencing of 5–10% of all samples using real-time PCR to reproduce the genotyping method (PCR-RFLP). Sequencing was performed by dideoxy chain termination using BigDye technology (Applied Biosystems, Foster City, CA, USA). PCR products were purified using a magnesium-chloride/ethanol-based protocol and run on an ABI 3100 Genetic Analyzer (AB Applied Biosystems). The genotype concordance rate in all samples was 100%.

### 3. Non-compartment analysis

Calculations of the basic pharmacokinetic parameters of zaltoprofen were performed by non-compartment analysis (NCA) using Phoenix WinNonlin software (8.3 version, Pharsight, Certara Inc.). The area under the curve from 0 h to infinite ( $AUC_{inf}$ ) was calculated as the sum of  $AUC_{0-t}$  and  $C_{last}/k$ , where  $C_{last}$  is the final measured concentration,  $t$  is the time in  $C_{last}$ , and  $k$  is the elimination rate constant at terminal phase.  $AUC_{0-t}$  was calculated using a linear trapezoidal rule from 0 to  $t$  h after oral administration of zaltoprofen. The half-life ( $T_{1/2}$ ) was calculated as  $0.693/k$ , and the volume of the distribution ( $V/F$ ) was calculated as  $dose/k \cdot AUC_{0-\infty}$ . The clearance ( $CL/F$ ) was calculated by dividing the dose of zaltoprofen by  $AUC_{0-\infty}$ , where  $F$  is the oral administration bioavailability. The peak plasma drug concentration ( $C_{max}$ ) and time to reach  $C_{max}$  ( $T_{max}$ ) were determined from the plasma zaltoprofen concentration-time curves of each individual.

### 4. Model qualification tools

The Goodness-of-fit (GOF) was confirmed using diagnostic scatter plots as follows: (A) population-predicted concentrations (PRED) versus observed concentrations (DV), (B)

individual-predicted concentrations (IPRED) versus DV, (C) PRED versus conditional weighted residuals (CWRES), (D) time after dose (IVAR) versus CWRES, (E) quantile-quantile (QQ) plot of the components of CWRES, and (F) QQ plot of the components of individual weighted residuals (IWRES). A visual predictive check (VPC) of the final established model was performed using the VPC option of Phoenix NLME (version 8.3). There were 100 simulations for the VPC. The IVAR–DV concentration data were graphically superimposed on the median values and the 5<sup>th</sup> and 95<sup>th</sup> percentiles of the IVAR-simulated concentration profiles. If the DV concentration data were approximately distributed within the 95<sup>th</sup> and 5<sup>th</sup> prediction interval, the model was expected to be precise. The stability of the final model was confirmed using non-parametric bootstrap analysis via the bootstrap option of Phoenix NLME. A total of 1,000 replicates were generated by repeated random sampling with replacement from the original dataset. The estimated parameter values, such as the standard errors [SE; including confidence interval (CI)] and medians from the bootstrap procedure, were compared with those estimated from the original dataset. The normalized prediction distribution error (NPDE) was used to evaluate the predictive performance of the model based on a Monte Carlo simulation with the R-package. NPDE results were summarized graphically using (A) quantile–quantile plot of the NPDE, (B) a histogram of the NPDE, (C) a scatterplot of NPDE versus IVAR, and (D) a scatterplot of NPDE versus PRED. The NPDE will follow a normal distribution if the predictive performance is satisfied (Shapiro–Wilk test) with a mean value of zero (*t*-test) and a variance of one (Fisher’s test).

**Table S1.** The basic pharmacokinetic structural model of zaltoprofen.

| Model                    | Description                                              | nParameter <sup>a</sup> | -2LL    | AIC     | $\Delta$ -2LL | $\Delta$ AIC | Compared with |
|--------------------------|----------------------------------------------------------|-------------------------|---------|---------|---------------|--------------|---------------|
| <b>Compartment model</b> |                                                          |                         |         |         |               |              |               |
| 01                       | 1-compartment                                            | 7                       | 2854.25 | 2876.53 | -             | -            | -             |
| 02*                      | 2-compartment                                            | 11                      | 643.72  | 665.72  | -2210.527884  | -2210.811473 | 01            |
| 03                       | 3-compartment                                            | 15                      | 643.59  | 665.68  | -0.13         | -0.04        | 02            |
| <b>Absorption model</b>  |                                                          |                         |         |         |               |              |               |
| 02*                      | No lag-time                                              | 11                      | 643.72  | 665.72  | -             | -            | -             |
| 02-01                    | Add lag-time                                             | 13                      | 714.30  | 726.57  | 70.5819       | 60.8527      | 02            |
| 02-02                    | No lag-time; Non sequential two absorption compartment** | 15                      | 644.30  | 666.73  | 0.5819        | 1.0148       | 02            |
| 02-03                    | No lag-time; Sequential two absorption compartment**     | 13                      | 652.53  | 665.19  | 8.8152        | -0.5253      | 02            |

### Residual error model

|        |              |    |        |        |         |         |    |
|--------|--------------|----|--------|--------|---------|---------|----|
| 02     | Additive     | 11 | 643.72 | 665.72 | -       | -       | -  |
| 02-04* | Proportional | 11 | 168.75 | 190.75 | -474.97 | -474.97 | 02 |
| 02-05  | Log additive | 11 | 443.37 | 465.37 | -200.35 | -200.35 | 02 |
| 02-06  | Mixed        | 12 | 168.77 | 192.77 | -474.95 | -472.95 | 02 |
| 02-07  | Power        | 11 | 643.72 | 665.72 | 0.00    | 0.00    | 02 |

### Inter-individual variability (IIV) model

|           |                                                 |    |        |        |       |        |          |
|-----------|-------------------------------------------------|----|--------|--------|-------|--------|----------|
| 02-04-01  | Remove IIV <sup>b</sup> K <sub>a</sub>          | 10 | 227.00 | 247.00 | 58.25 | 56.25  | 02-04    |
| 02-04-02  | Remove IIV <sup>b</sup> V/F                     | 10 | 168.74 | 188.74 | -0.01 | -2.01  | 02-04    |
| 02-04-03  | Remove IIV <sup>b</sup> V <sub>2</sub> /F       | 10 | 181.31 | 201.31 | 12.56 | 10.56  | 02-04    |
| 02-04-04  | Remove IIV <sup>b</sup> CL/F                    | 10 | 247.87 | 267.87 | 79.13 | 77.13  | 02-04    |
| 02-04-05  | Remove IIV <sup>b</sup> CL <sub>2</sub> /F      | 10 | 171.34 | 191.34 | 2.60  | 0.60   | 02-04    |
| 02-04-06* | Remove IIV <sup>b</sup> V/F, CL <sub>2</sub> /F | 9  | 168.74 | 186.74 | 0.000 | -2.000 | 02-04-02 |

---

<sup>a</sup> nParameter means the total number of parameters applied to the model.

<sup>b</sup> IIV means the inter-individual variation.

\* means the model selected in each step.

\*\* means a kind of multiple absorption compartment models.

**Table S2.** Stepwise selection of potential covariates in the population pharmacokinetic model of zaltoprofen.

| Model | Description                             | OFV    | $\Delta$ OFV | Compared with | nParameter <sup>a</sup> |
|-------|-----------------------------------------|--------|--------------|---------------|-------------------------|
| 1     | Base model                              | 168.74 | -            | -             | 9                       |
| 2     | Genotype** on K <sub>a</sub>            | 167.19 | -1.544       | Base model    | 10                      |
| 3     | Genotype** on V <sub>2</sub> /F         | 165.01 | -3.722       | Base model    | 10                      |
| 4     | Genotype** on CL/F                      | 164.89 | -3.845       | Base model    | 10                      |
| 5     | CrCL on V <sub>2</sub> /F               | 168.74 | 0.000        | Base model    | 10                      |
| 6     | CrCL on CL/F                            | 160.73 | -8.002       | Base model    | 10                      |
| 7     | BSA on CL/F                             | 166.66 | -2.076       | Base model    | 10                      |
| 8     | Albumin on CL/F                         | 161.72 | -7.013       | Base model    | 10                      |
| 9     | Genotype** and CrCL on CL/F             | 160.36 | -0.374       | Model 6       | 11                      |
| 10*   | CrCL and albumin on CL/F                | 153.18 | -7.552       | Model 6       | 11                      |
| 11    | Genotype** and CrCL and albumin on CL/F | 153.23 | 0.046        | Model 10      | 12                      |

<sup>a</sup> nParameter is the total number of parameters applied to the model.

\* indicates the final model.

\*\* indicates genetic polymorphisms of the CYP2C9 genotypes \*1/\*1 and \*1/\*3.

**Table S3.** Parameter values of the final population pharmacokinetic model for zaltoprofen.

| Parameter                   | Estimate | SE <sup>a</sup> | RSE (%) <sup>a</sup> | Shrinkage (%) | IIV <sup>b</sup> (%) |
|-----------------------------|----------|-----------------|----------------------|---------------|----------------------|
| tv K <sub>a</sub> (1/h)     | 1.73     | 0.15            | 8.56                 |               |                      |
| tv V/F (L)                  | 4.88     | 1.28            | 26.32                |               |                      |
| tv CL/F (L/h)               | 43.70    | 2.12            | 4.85                 |               |                      |
| tv V <sub>2</sub> /F (L)    | 40.56    | 7.02            | 17.32                |               |                      |
| tv CL <sub>2</sub> /F (L/h) | 5.61     | 0.63            | 11.16                |               |                      |
| dCL/FdCrCL                  | 0.48     | 0.17            | 35.09                |               |                      |
| dCL/FdAlbumin               | -1.83    | 0.64            | 35.18                |               |                      |
| $\omega^2_{K_a}$            | 0.17     | 0.06            | 33.95                | 0.09          | 40.63                |
| $\omega^2_{V_2/F}$          | 0.24     | 0.08            | 32.31                | 0.21          | 48.55                |
| $\omega^2_{CL/F}$           | 0.01     | 0.00            | 46.60                | 0.34          | 9.80                 |
| $\varepsilon$               | 0.38     | 0.02            | 6.03                 |               |                      |

<sup>a</sup> SE and RSE indicate standard error and relative standard error, respectively.

<sup>b</sup> IIV indicates the inter-individual variation.

tv indicates the typical value.

**Table S4.** Bootstrap results of the final population pharmacokinetic model for zaltoprofen.

| Parameter                   | Final model |                     | Bootstrap ( $n = 1000$ ) |                     |
|-----------------------------|-------------|---------------------|--------------------------|---------------------|
|                             | Estimate    | 95% CI <sup>a</sup> | Median                   | 95% CI <sup>a</sup> |
| tv K <sub>a</sub> (1/h)     | 1.73        | 1.43 - 2.02         | 1.73                     | 1.52 - 1.96         |
| tv V/F (L)                  | 4.88        | 2.35 - 7.41         | 4.59                     | 2.98 - 8.18         |
| tv CL/F (L/h)               | 43.70       | 39.52 - 47.87       | 43.32                    | 38.36 - 48.01       |
| tv V <sub>2</sub> /F (L)    | 40.56       | 26.74 - 52.39       | 40.69                    | 29.45 - 58.85       |
| tv CL <sub>2</sub> /F (L/h) | 5.61        | 4.38 - 6.84         | 5.52                     | 4.51 - 6.66         |
| dCL/FdCrCL                  | 0.48        | 0.15 - 0.81         | 0.48                     | 0.16 - 0.81         |
| dCL/FdAlbumin               | -1.83       | -3.10 - -0.56       | -1.70                    | -3.11 - -0.80       |
| $\omega^2_{K_a}$            | 0.17        | 0.06 - 0.28         | 0.15                     | 0.07 - 0.24         |
| $\omega^2_{V_2/F}$          | 0.24        | 0.09 - 0.39         | 0.21                     | 0.06 - 0.37         |
| $\omega^2_{CL/F}$           | 0.01        | 0.00 - 0.02         | 0.01                     | 0.00 - 0.02         |
| $\varepsilon$               | 0.38        | 0.34 - 0.43         | 0.38                     | 0.34 - 0.42         |

<sup>a</sup> CI indicates confidence interval.

tv indicates typical value.

**Table S5.** Demographic information of the healthy Korean males on single oral administration of 80 mg zaltoprofen ( $n = 26$ ).

| Demographic         | Unit  | Value (mean $\pm$ standard deviation) |
|---------------------|-------|---------------------------------------|
| Age                 | Year  | 23.19 $\pm$ 2.26                      |
| Weight              | kg    | 64.73 $\pm$ 8.08                      |
| Height              | cm    | 172.64 $\pm$ 5.95                     |
| Total proteins      | g/dL  | 7.35 $\pm$ 0.38                       |
| Albumin             | g/dL  | 4.92 $\pm$ 0.18                       |
| ALP                 | IU/L  | 73.23 $\pm$ 15.30                     |
| AST                 | IU/L  | 19.23 $\pm$ 3.86                      |
| ALT                 | IU/L  | 18.23 $\pm$ 8.28                      |
| Total bilirubin     | mg/dL | 1.03 $\pm$ 0.41                       |
| Blood urea nitrogen | mg/dL | 12.93 $\pm$ 2.29                      |
| Creatinine          | mg/dL | 0.98 $\pm$ 0.09                       |

|      |                   |                    |
|------|-------------------|--------------------|
| CrCL | mL/min            | 107.53 $\pm$ 17.28 |
| BMI  | kg/m <sup>2</sup> | 21.74 $\pm$ 2.60   |
| BSA  | m <sup>2</sup>    | 1.76 $\pm$ 0.12    |
| GFR  | mL/min            | 101.34 $\pm$ 11.53 |

---

ALP, alkaline phosphatase; AST, aspartate transaminase; ALT, alanine transaminase; CrCL, creatinine clearance; BMI, body mass index; BSA, body surface area; GFR, glomerular filtration rate.

**Table S6.** Past clinical studies applied to the external validation.

| <b>References</b>      | <b>Administration</b>                                                                                           | <b>Group</b>                   | <b>Sampling time</b>                           |
|------------------------|-----------------------------------------------------------------------------------------------------------------|--------------------------------|------------------------------------------------|
| Kang et al. (2006) [1] | 80 mg/single oral dose                                                                                          | 26 healthy Korean males        | 0-24 h (after dose)                            |
| Lee et al. (2006) [2]  | 160 mg/single oral dose                                                                                         | 24 healthy Korean males        | 0-24 h (after dose)                            |
| Li et al. (2011) [3]   | 80, 160, 240 mg/single oral dose                                                                                | 12 healthy Chinese individuals | 0-24 h (after dose)                            |
|                        | 80 mg/multiple oral doses (for six days at eight h intervals; one dose on the seventh day after administration) | 12 healthy Chinese individuals | 120 h, 144 h, and 168-192 h (after first dose) |

### Supplementary figure captions

**Figure S1.** Comparison graphs of zaltoprofen pharmacokinetic parameters [(A)  $T_{1/2}$ , (B)  $T_{\max}$ , (C)  $C_{\max}$ , (D)  $AUC_{0-t}$ , (E)  $AUC_{\text{inf}}$ , (F)  $V/F$ , and (G)  $CL/F$ ] between CYP2C9\*1/\*1 and \*1/\*3. \* reveals a statistically significant difference between CYP2C9\*1/\*1 and \*1/\*3 with  $p < 0.05$ . The  $p$ -values for (A), (B), (C), (D), (E), (F), and (G) were 0.053, 0.024, 0.925, 0.185, 0.078, 0.287, and 0.093, respectively. Significance was confirmed through the  $t$ -test after checking variance equality (A, C, D, E, F, and G) between groups by the  $F$ -test. If equal variances were not established (B), a  $t$ -test based on the assumption of heterogeneity was performed.

**Figure S2.** Pharmacokinetic profiles according to CYP2C9 genotypes (CYP2C9\*1/\*1 and \*1/\*3) and means in 26 Korean males following single oral administration of 80 mg zaltoprofen. Vertical bars indicate the standard deviation.

**Figure S3.** Relationship between subjects' physicochemical parameters and individual predicted pharmacokinetic parameters. (A)  $CL/F$  of zaltoprofen according to CrCL, (B)  $AUC_{0-t}$  of zaltoprofen according to CrCL, (C)  $CL/F$  of zaltoprofen according to albumin, (D)  $CL/F$  of zaltoprofen according to GFR, and (E)  $CL/F$  of zaltoprofen according to BSA.

**Figure S4.** Relationship between subjects' physicochemical parameters and individual predicted pharmacokinetic parameters. (A)  $CL/F$  of zaltoprofen according to ALT, (B)  $CL/F$  of zaltoprofen according to ALP, (C)  $CL/F$  of zaltoprofen according to BUN, (D)  $CL/F$  of zaltoprofen according to BMI, (E)  $V/F$  of zaltoprofen according to BSA, (F)  $V/F$  of zaltoprofen according to BMI, and (G)  $V/F$  of zaltoprofen according to albumin.

**Figure S5.** Goodness-of-fit plots of final pharmacokinetic model for zaltoprofen. (A) Population-predicted concentrations (PRED) against observed plasma concentration (DV), (B) individual-predicted concentrations (IPRED) against DV, (C) PRED against conditional weighted residuals (CWRES), (D) time after dose (IVAR) against CWRES, (E) quantile–quantile (QQ) plot of CWRES components, and (F) QQ plot of individual weighted residual (IWRES) components.

**Figure S6.** Normalized prediction distribution error (NPDE) plots for the population

pharmacokinetic model of zaltoprofen. (A) Quantile-quantile plots of NPDE versus the theoretical  $N(0, 1)$  distribution. (B) Histogram of the NPDE distribution overlaid with the standard Gaussian distribution density. (C) Scatter plot of time versus NPDE. (D) Scatterplot of predictions versus NPDE.

**Figure S7.** VPC of the final pharmacokinetics model for zaltoprofen. Observed concentrations (after oral administration of 80 mg) are depicted by the black dots. The 95<sup>th</sup>, 50<sup>th</sup>, and 5<sup>th</sup> percentiles of the predicted concentrations are represented by the black dashed lines. The 95% confidence intervals (CI) for the predicted 5<sup>th</sup> and 95<sup>th</sup> percentiles are represented by the blue shaded regions. The 95% CI for the predicted 50<sup>th</sup> percentiles are represented by the red shaded regions. X-axis indicates the time after oral zaltoprofen administration and the Y-axis shows the observed and predicted plasma concentrations of zaltoprofen.

**Figure S8.** VPC of pharmacokinetics of the final model for zaltoprofen [with stratification according to CYP2C9 genotypes; (A) CYP2C9\*1/\*1 and (B) CYP2C9\*1/\*3]. Observed concentrations (after 80 mg oral administration) are depicted by the black dots. The 95<sup>th</sup>, 50<sup>th</sup>, and 5<sup>th</sup> percentiles of the predicted concentrations are represented by the black dashed lines. The 95% confidence intervals (CI) for the predicted 5<sup>th</sup> and 95<sup>th</sup> percentiles are represented by the blue shaded regions. The 95% CI for the predicted 50<sup>th</sup> percentiles are represented by the red shaded regions. X-axis indicates the time after oral zaltoprofen administration and the Y-axis shows the observed and predicted plasma concentrations of zaltoprofen.

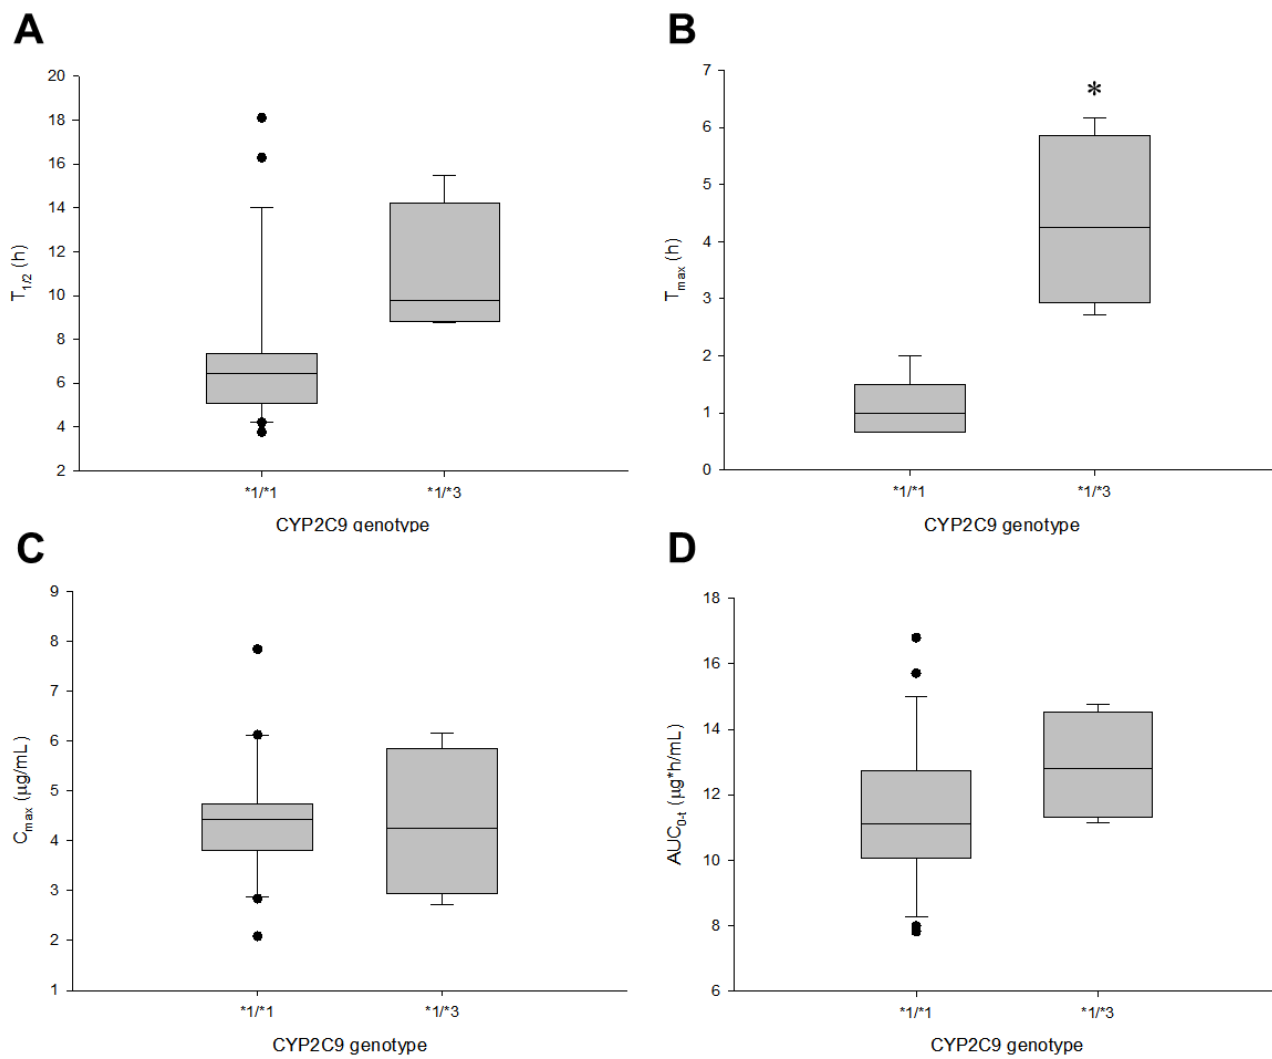

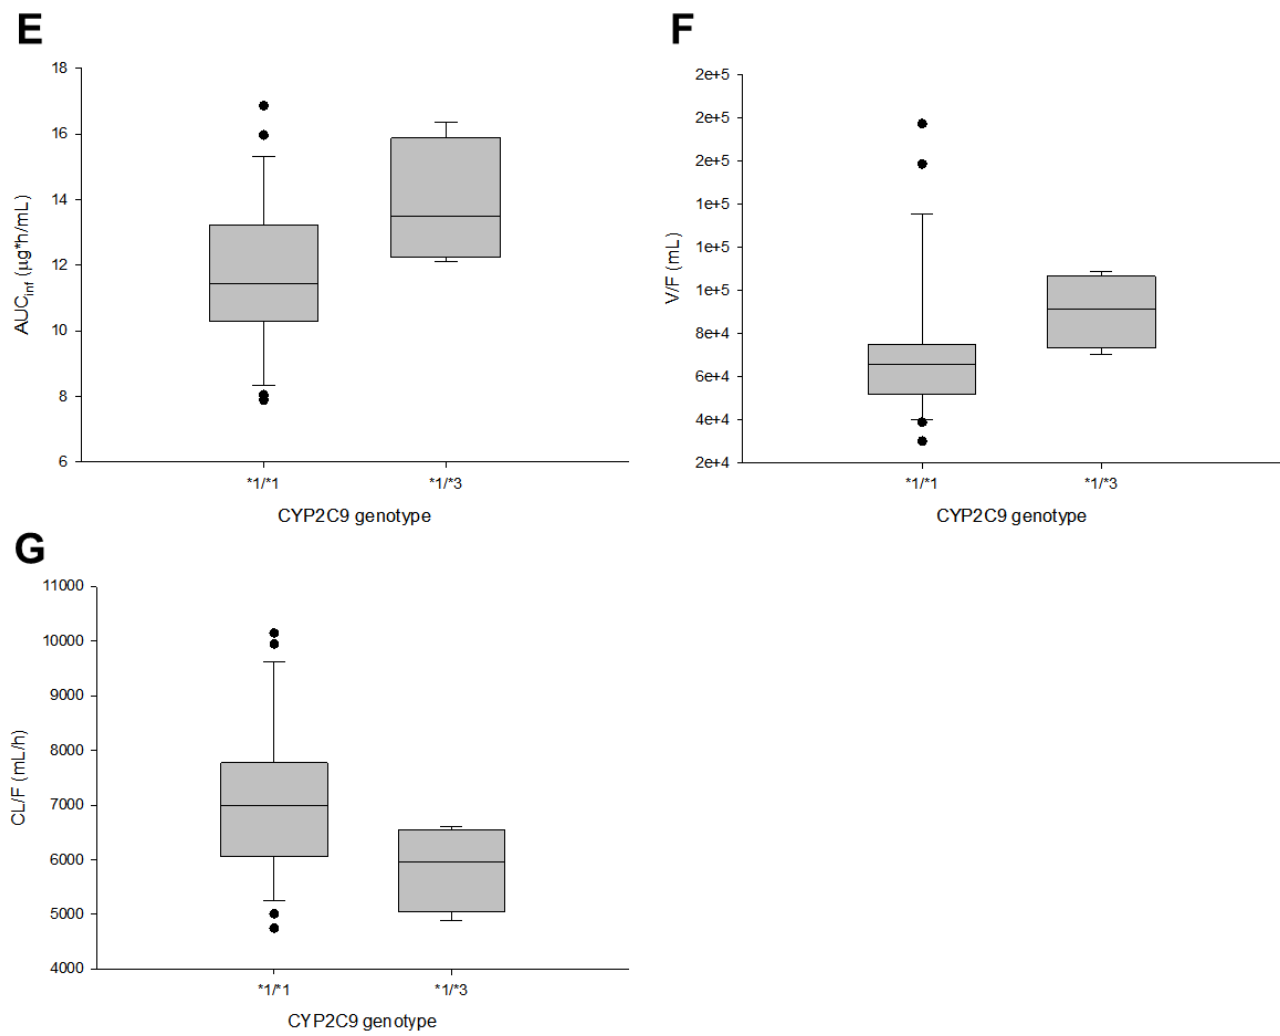

**Figure S1**

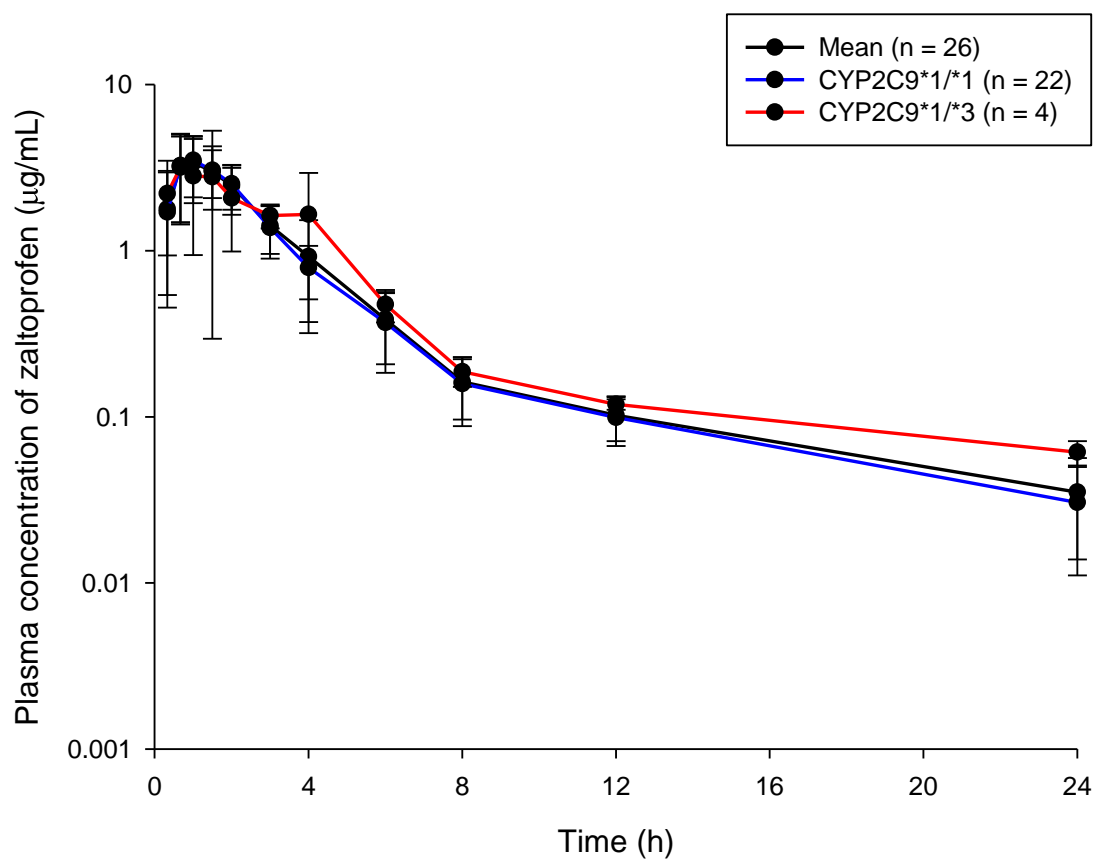

**Figure S2**

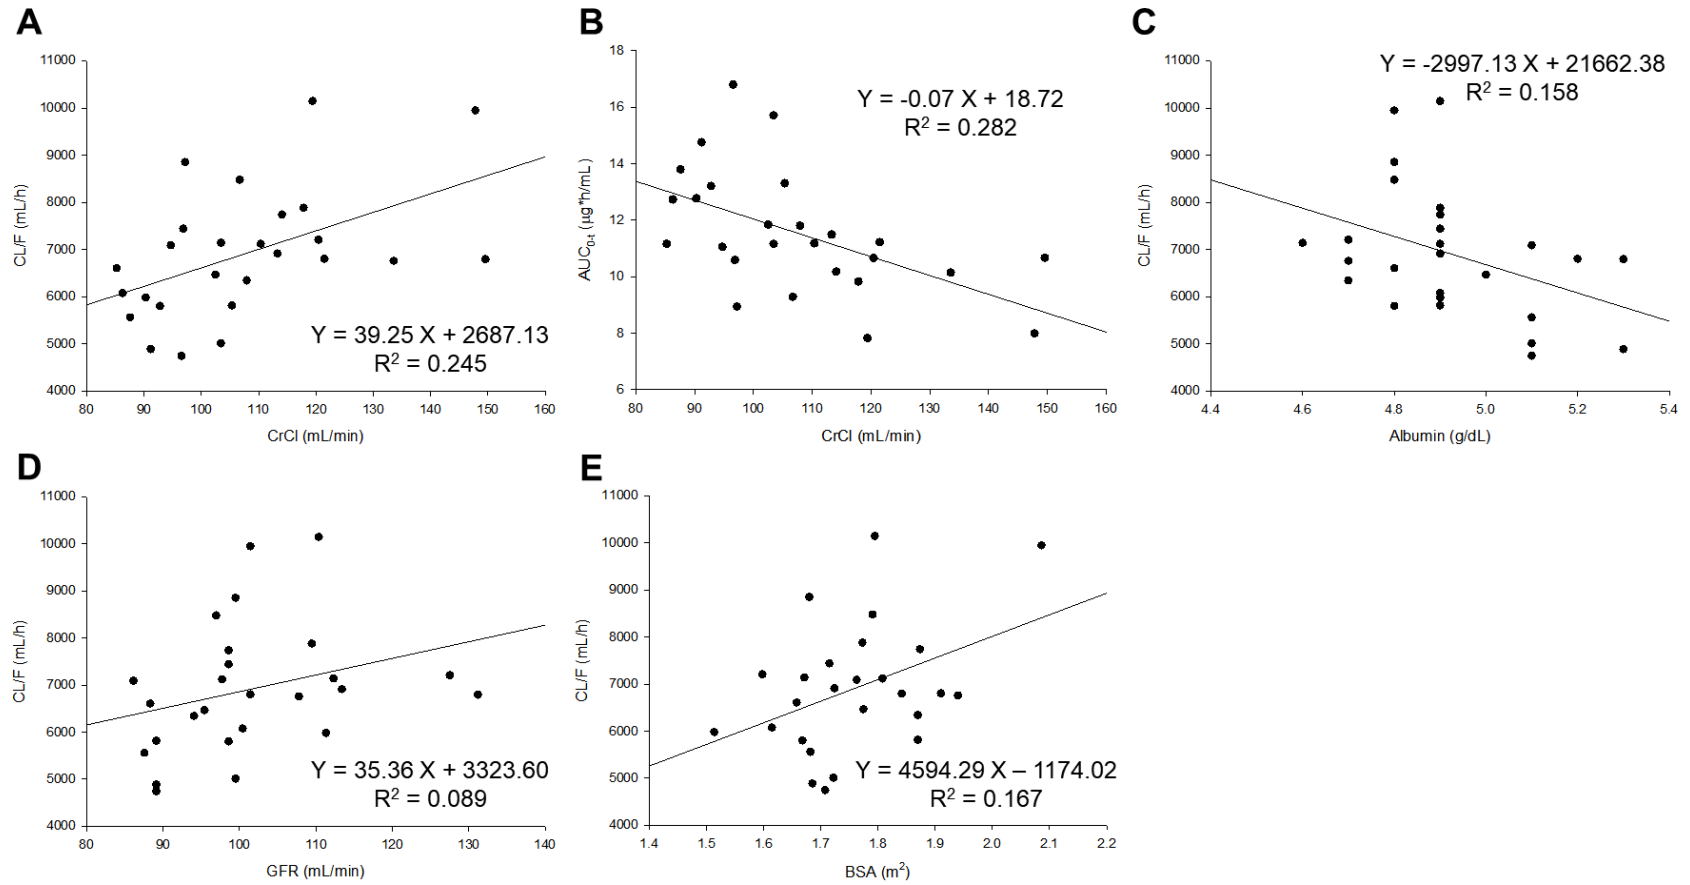

**Figure S3**

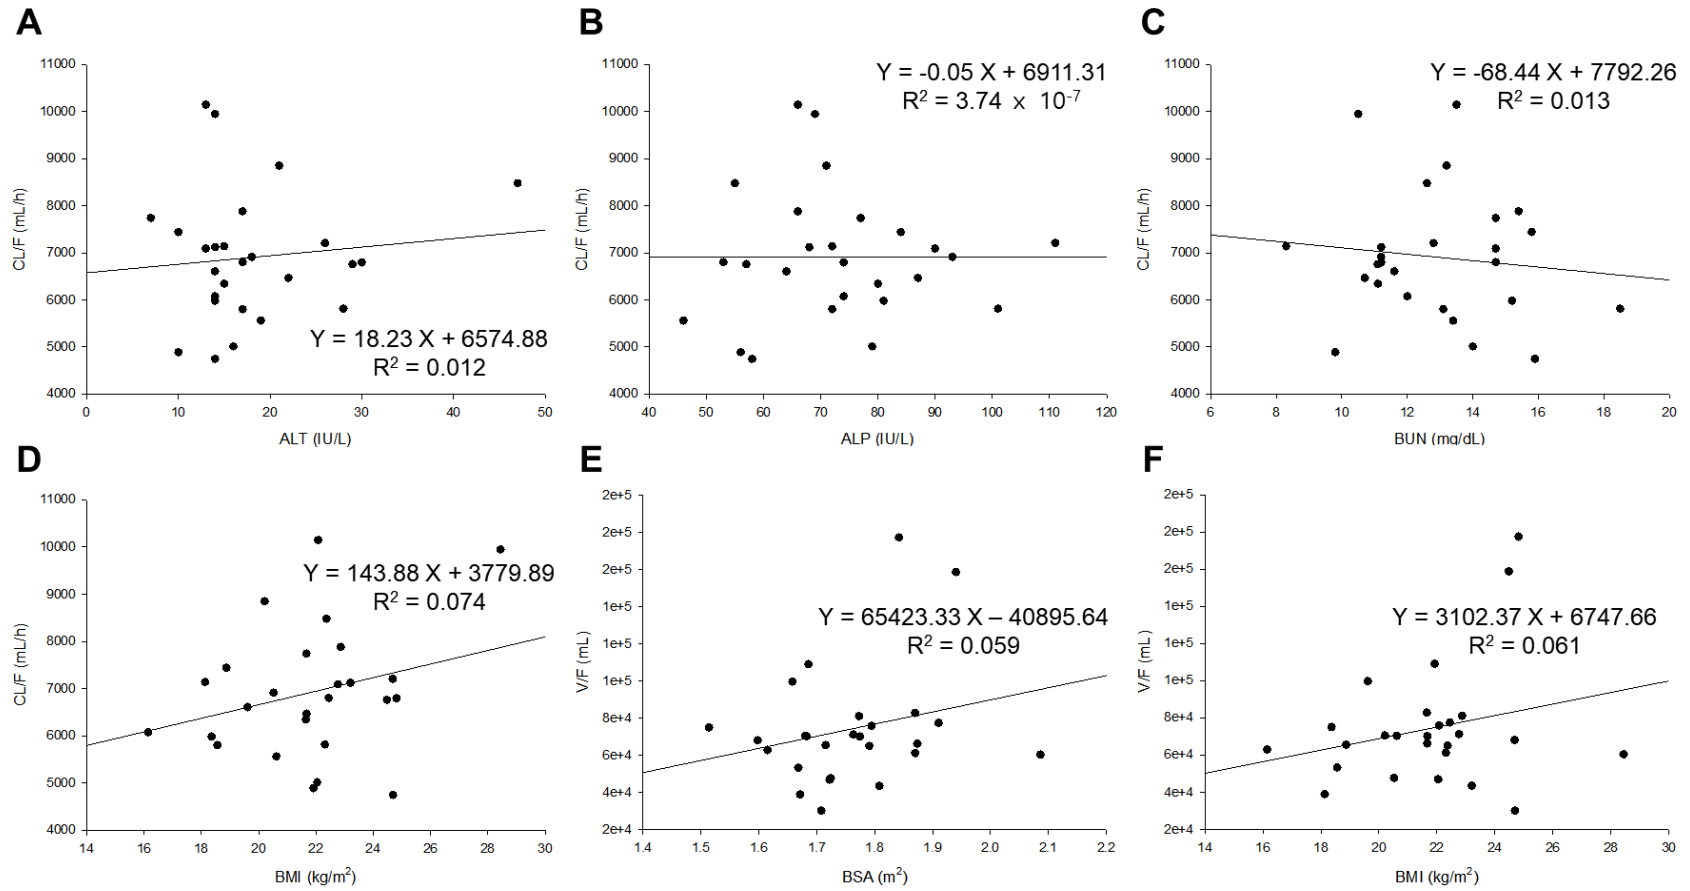

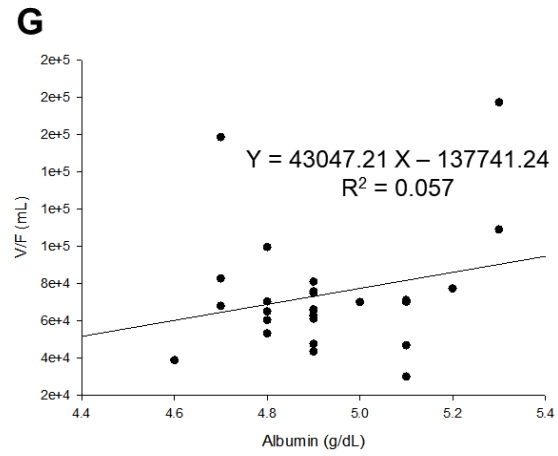

**Figure S4**

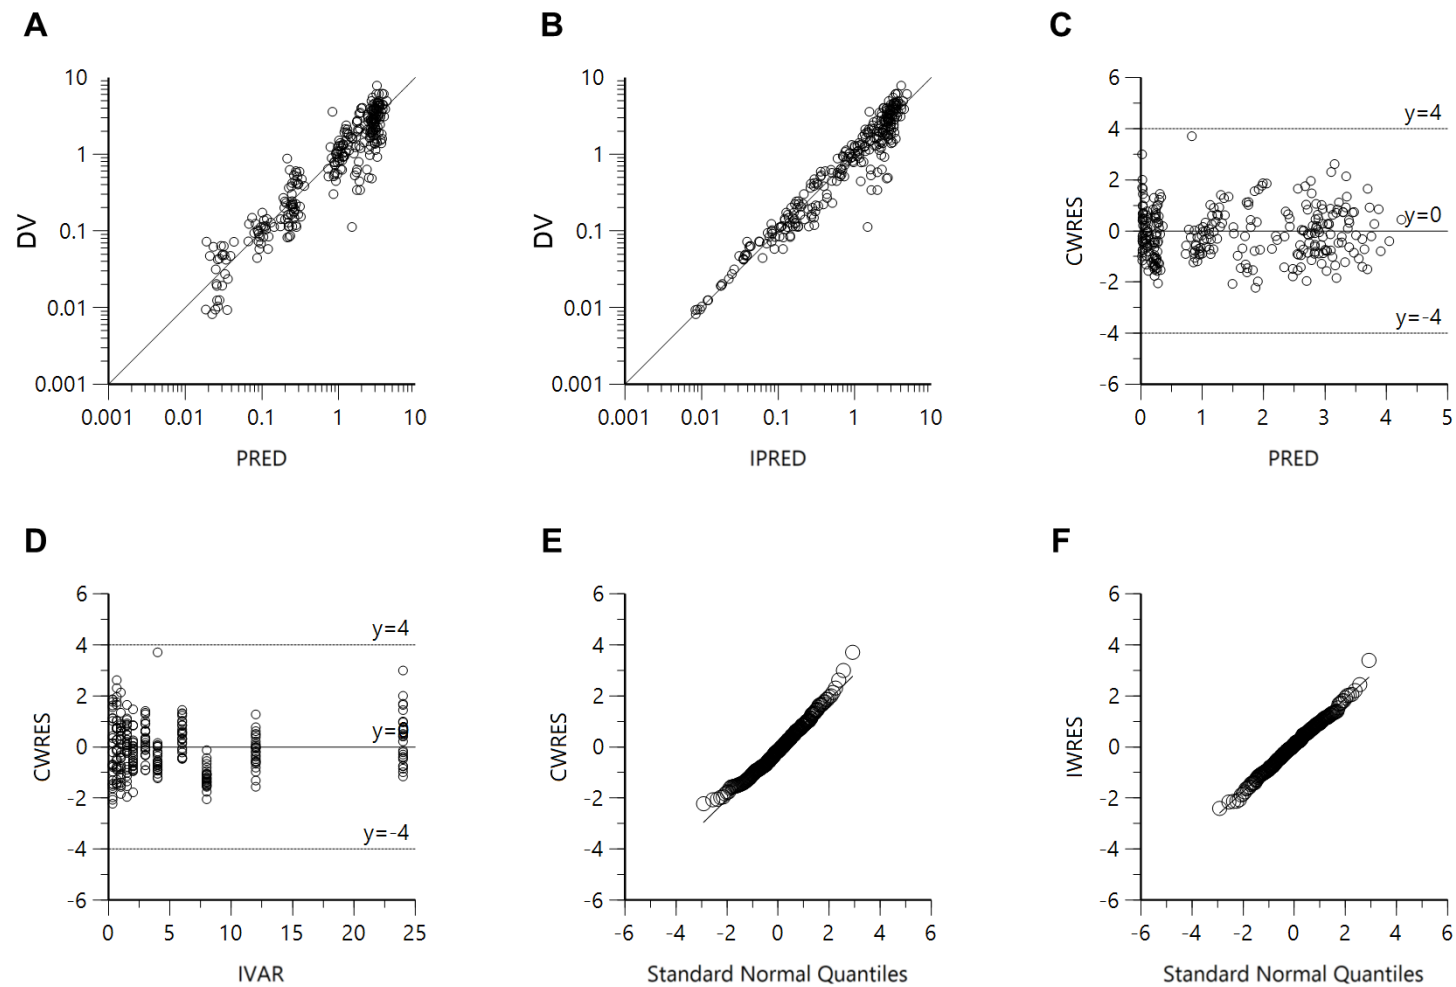

**Figure S5**

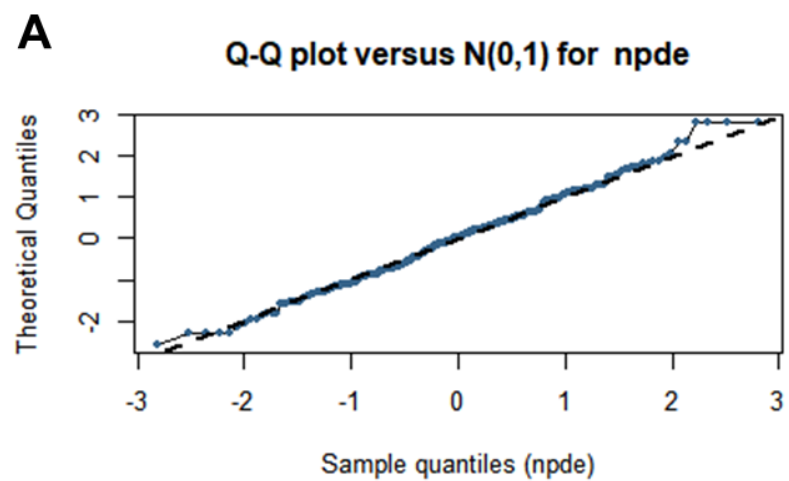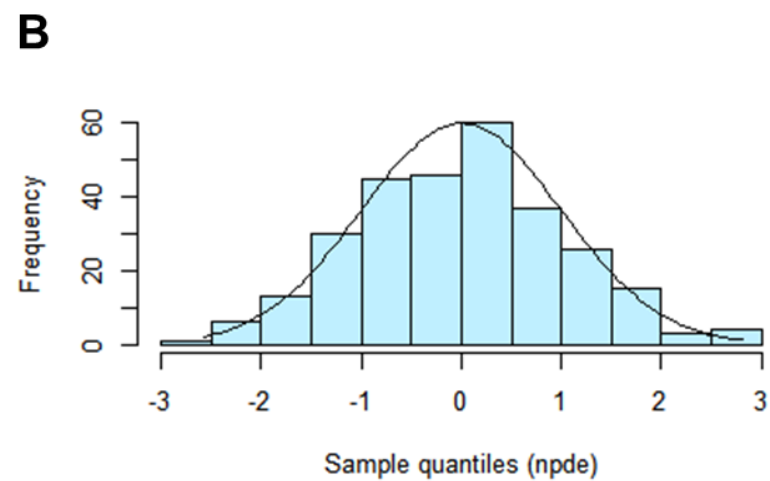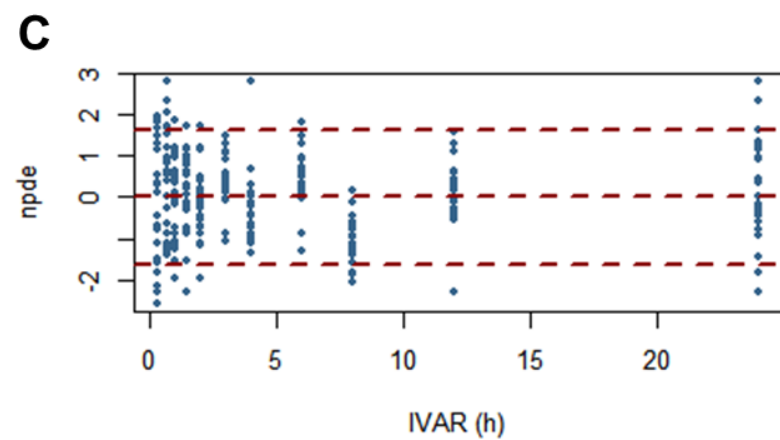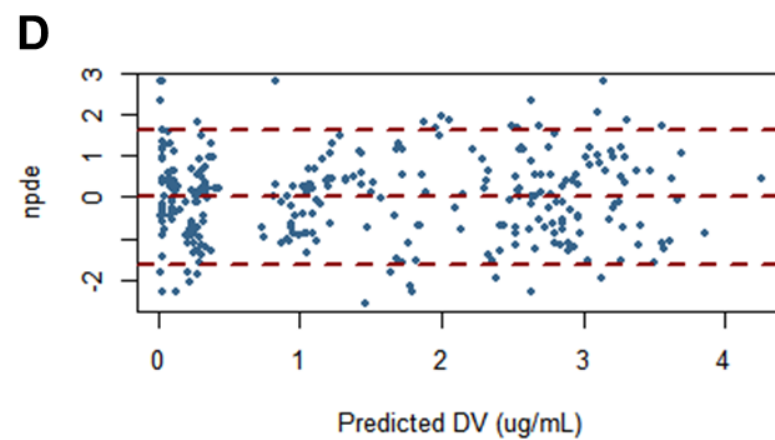

Figure S6

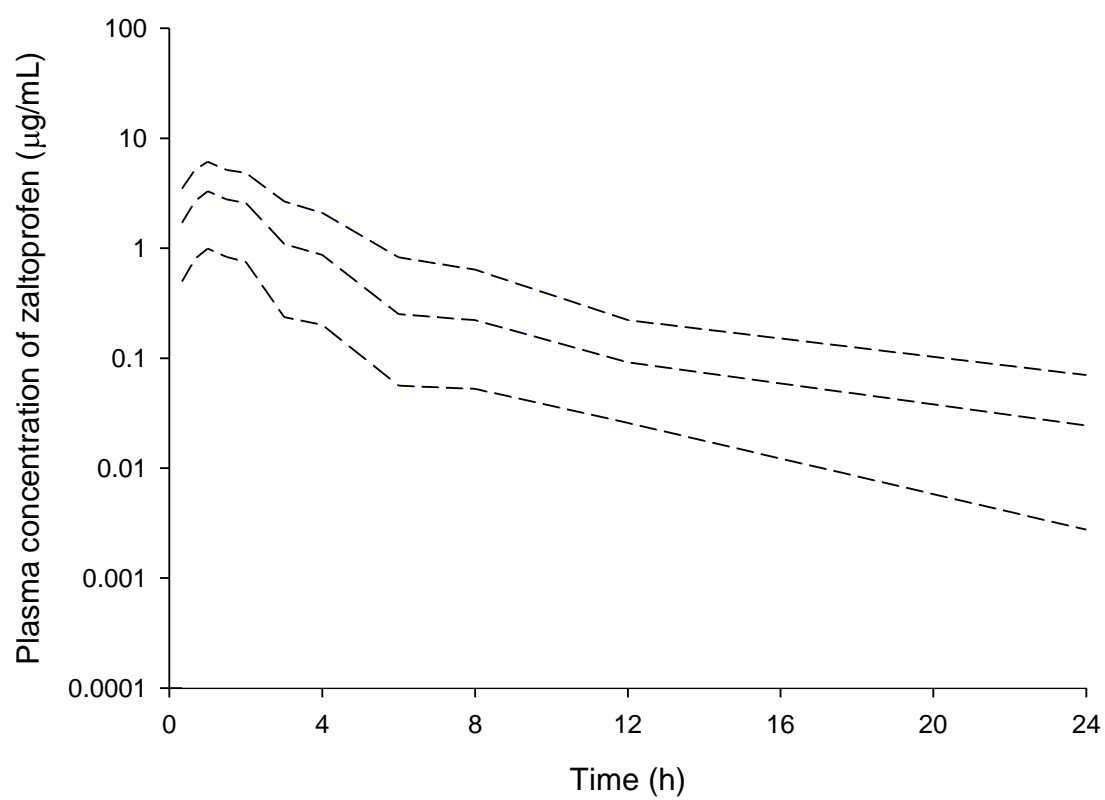

**Figure S7**

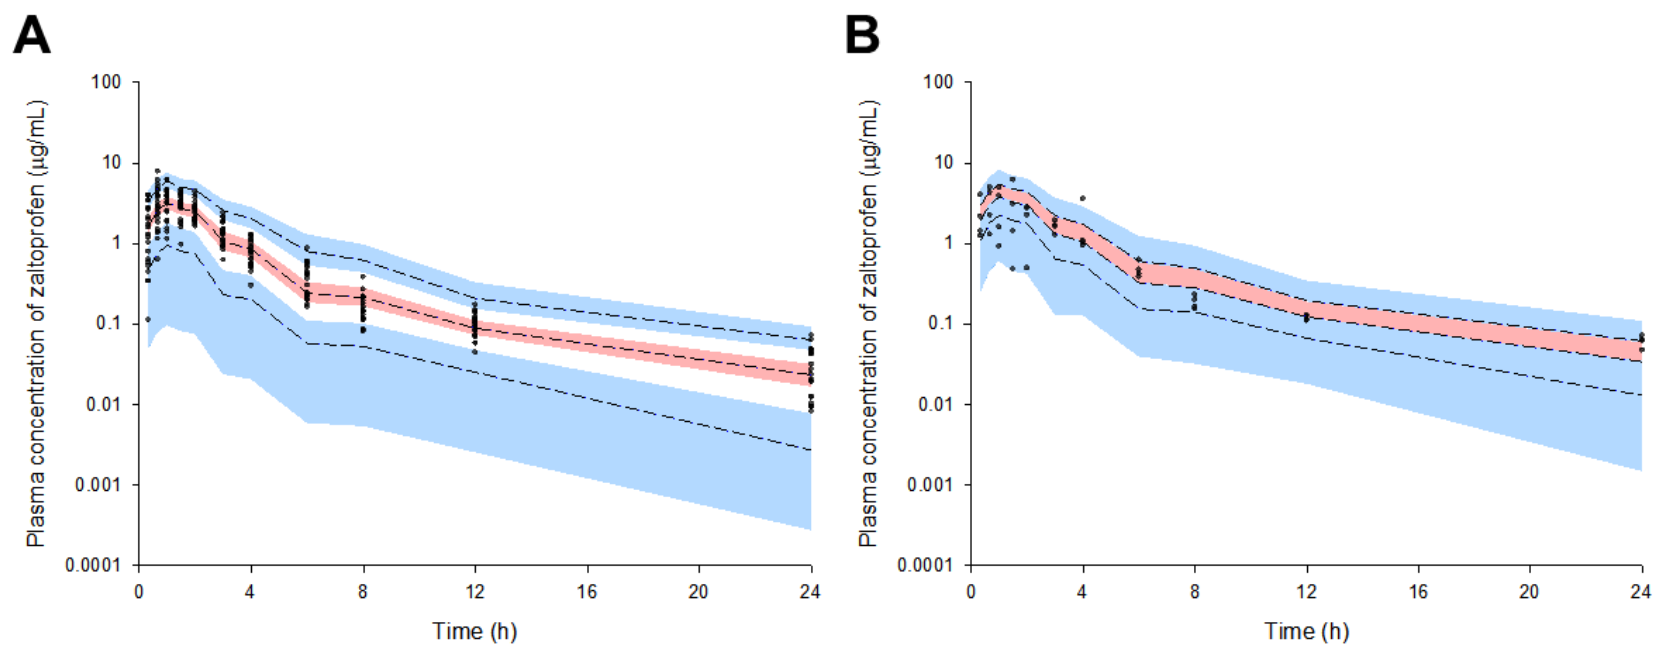

**Figure S8**

## References

1. Kang, H.-A.; Park, S.; Kim, D.-H.; Kim, H.-H.; Yun, H.; Kim, K.-R.; Yoo, H.-D.; Park, E.-J.; Cho, H.-Y.; Lee, Y.-B. Bioequivalence of SCD Zaltoprofen Tablet to Soleton® Tablet (Zaltoprofen 80 mg). *J Pharm Investig* **2006**, *36*, 209-215.
2. Lee, H.W.; Seo, J.H.; Kim, Y.W.; Jeong, S.Y.; Lee, K.T. Determination of zaltoprofen in human plasma by liquid chromatography with electrospray tandem mass spectrometry: application to a pharmacokinetic study. *Rapid Commun Mass Spectrom* **2006**, *20*, 2675-2680.
3. Li, L.; Ma, P.; Cao, Y.; Tao, L.; Tao, Y. Single-dose and multiple-dose pharmacokinetics of zaltoprofen after oral administration in healthy Chinese volunteers. *J Biomed Res* **2011**, *25*, 56-62.
